1 *In vitro* community synergy between bacterial soil isolates can  
2 be facilitated by pH stabilisation of the environment

3

4 **Jakob Herschend**<sup>†</sup>, **Klaus Koren**<sup>†\*</sup>, Henriette L. Røder<sup>†</sup>, Asker Brejnrod<sup>§</sup>, Michael Kühl<sup>#</sup> and  
5 Mette Burmølle<sup>†</sup>

6 <sup>†</sup> Section for Microbiology, University of Copenhagen, Denmark

7 <sup>‡</sup>Department of Bioscience - Microbiology, Aarhus University, Denmark

8 <sup>§</sup>Section for Metabolic Genetics, Novo Nordisk Foundation center for Basic Metabolic  
9 Research, Denmark

10 <sup>#</sup> Marine Biological Section, University of Copenhagen, Denmark

11

12 \* These authors contributed equally to this study

13

14 **Number of figures and tables:** 5 figures, 1 supplementary table and 19 supplementary  
15 figures

16

17 **Correspondence:** Mette Burmølle, Universitetsparken 15 Bldg. 1, 2100 Ø, Denmark.  
18 +4540220069, [burmolle@bio.ku.dk](mailto:burmolle@bio.ku.dk)

19

20 **Running title:**

21 Enhanced community growth through pH stabilisation

22

23

## 24 Abstract

25 Composition and development of naturally occurring microbial communities is defined by a  
26 complex interplay between the community and the surrounding environment and by  
27 interactions between community members. Intriguingly, these interactions can in some cases  
28 cause community synergies where the community is able to outperform its single species  
29 constituents. However, the underlying mechanisms driving community interactions are  
30 often unknown and difficult to identify due to high community complexity. Here we show  
31 how pH stabilisation of the environment through the metabolic activity of specific  
32 community members acts as a positive inter-species interaction driving *in vitro* community  
33 synergy in a model consortium of four co-isolated soil bacteria: *Microbacterium oxydans*,  
34 *Xanthomonas retroflexus*, *Stenotrophomonas rhizophila* and *Paenibacillus amylolyticus*. Using  
35 micro-sensor pH measurements to show how individual species change the local pH micro-  
36 environment, and how co-cultivation leads to a stabilised pH regime over time. Specifically,  
37 *in vitro* acid production from *Paenibacillus amylolyticus* and alkali production primarily from  
38 *Xanthomonas retroflexus* lead to an overall pH stabilisation of the local environment over  
39 time, which in turn resulted in enhanced community growth. This specific type of inter-  
40 species interaction was found to be highly dependent on media type and media  
41 concentration, however similar pH drift from the individual species could be observed  
42 across media variants.

## 43 Importance

44 We show that *in vitro* metabolic activity of individual members of a synthetic, co-isolated  
45 model community presenting community synergistic growth arises through the inter-  
46 species interaction of pH stabilization of the community micro-environment. The observed

47 inter-species interaction is highly media specific and most pronounced under high nutrient  
48 availability. This adds to the growing diversity of identified community interactions leading  
49 to enhanced community growth.

50

## 51 Introduction

52 Microbial communities are ubiquitous in natural and man-made environments and are  
53 routinely being applied for e.g. crop-management (1), bioremediation (2), waste-water  
54 treatment (3) and bio-energy production (4, 5). Hence, in terms of biotechnological  
55 applicability and environmental ecology, understanding key factors affecting microbial  
56 community development is indispensable (6). The actively growing community in a natural  
57 habitat is predominantly defined in diversity and composition by environmental factors e.g.  
58 O<sub>2</sub>, pH, salinity and temperature (7–11), where the chemical micro-environment is  
59 characterized by steep chemical gradients susceptible to rapid changes. By example, pH is  
60 recognized as an important factor for species composition in e.g. soil (11–13), as different  
61 species prefer specific pH regimes (14, 15). Albeit the strong environmental effect, microbial  
62 interactions also influence community composition e.g. through molecular mechanisms such  
63 as cooperative cross-feeding (16–18) and cross-protection from anti-biotics (19, 20) or  
64 through competition by toxin secretion (21). An additional mode of interaction is based on  
65 bacteria's ability to alter their local environment, e.g. by changing the local pH micro-  
66 environment by consumption of specific resources, secretion of metabolites or through the  
67 bio-chemical processes from metabolic activity causing a proton turnover (22, 23). Microbial  
68 pH drift of the environment is well known from several types of host-associated  
69 environments such as e.g. the human-associated vaginal (24) and oral (25) microbiomes, and  
70 from the well-known syntrophic relationship of industrial yoghurt production by  
71 *Lactobacillus bulgaricus* and *Streptococcus thermophiles* (26–29). Recently Ratzke *et al.* (2018)  
72 showed through *in vitro* studies that in unique cases bacteria may even cause pH drift to  
73 such an extent that it becomes detrimental for the population, a phenomenon termed

74 ecological suicide (15). As pH is an important parameter for microbial life, changing the pH  
75 environment will affect both the microbial population causing the change and neighbouring  
76 community members; Such pH interactions in co-cultures and how their outcome can be  
77 modelled have been elegantly documented in detail for *in vitro* co-cultures by Ratzke and  
78 Gore (2018) (14). Using specific laboratory isolates Ratzke and Gore (2018) showed that the  
79 outcome of pH driven interactions can be modelled when the pH drift and pH growth  
80 optimum is known for the interaction partners. The outcome of the interaction could then be  
81 categorized as e.g. bi-stability, successive growth, extended suicide or stabilization of  
82 growth. By example, stabilization defines a scenario where two bacteria, which on their own  
83 would create a detrimental pH environment, can co-exist by canceling each other's pH drift  
84 of the environment.

85 The range of interactions occurring in bacterial communities often facilitates the emergence  
86 of properties, which are only observed in a community setting and not from its single  
87 species members, referred to as community-intrinsic properties (30). An example of a  
88 community-intrinsic property is the synergistic biofilm formation recorded by Ren et al.  
89 (2015) (31) for a model community consisting of four co-isolated soil bacteria;  
90 *Stenotrophomonas rhizophila*, *Xanthomonas retroflexus*, *Microbacterium oxydans* and *Paenibacillus*  
91 *amylolyticus*. Work on this community has established that co-cultivation leads to enhanced  
92 biofilm formation, that all four species increase in cell counts through biofilm co-cultivation  
93 and that all four species are indispensable for the synergy to occur (31). Later studies has  
94 hinted that the synergy can be linked to a specific spatial organisation of community  
95 members during co-cultivation in biofilms (32), and meta-transcriptomics (33) and -  
96 proteomics (34) studies have identified amino acid cross-feeding as a potential driver for the

97 synergy. However, the impact of the community on its surrounding environment, and the  
98 mutual community-environment interplay, has not been explored. Hence in the framework  
99 of inter-species interactions occurring through changing the local environment, we here  
100 applied high resolution microsensor measurements of pH and O<sub>2</sub> (35, 36) in liquid cultures  
101 and solid surfaces to elucidate the role of the chemical micro-environment on the observed  
102 community synergy from this model community. In line with observations from Ratzke and  
103 Gore (2018), we find that three community members individually drive pH to un-favourable  
104 conditions hampering their own growth, whereas co-cultivation leads to a stabilisation of  
105 the environment, promoting community synergy.

## 106 Results

### 107 *Bacterial interactions on an agar plate*

108 The species were spotted in pairs of two on agar plates (50% TSA with congo red and  
109 coomassie brilliant blue G250), to screen for interactions between the species. Interactions  
110 would be detected by visual changes in colony morphology. After two days of incubation,  
111 colony morphology of *Paenibacillus* changed when spotted against *Xanthomonas*,  
112 *Stenotrophomonas* or *Microbacterium* (Fig. 1), compared to when spotted against itself. The  
113 changed *Paenibacillus* colony was increasingly red, indicating enhanced binding of congo  
114 red, and the colony texture was disordered in the peripheral part opposing the other species.  
115 The visually disordered part displayed directional growth towards the opposing colony,  
116 indicating attraction. The reaction was strongest against *Xanthomonas*. No visible interactions  
117 were observed among the other species pairs, as judged by colony morphology (Fig. S1).

118 *The chemical micro-environment in the agar*

119 As the morphological change of *Paenibacillus* indicated directional growth, it was  
120 hypothesized that *Xanthomonas* (and to a lesser extent *Stenotrophomonas* and *Microbacterium*)  
121 modified the chemical environment in the agar causing attraction of *Paenibacillus*. To probe  
122 the chemical micro-environment of the interaction zone between the colonies on agar plates,  
123 the zone was mapped in a 2.5 x 2.5 mm grid-structure using O<sub>2</sub> and pH micro-sensors  
124 mounted on a 3D motorised micro-manipulator (Fig. 2). The experimental setup is presented  
125 in Fig. S2. A visible morphological change of the *Paenibacillus* colony occurred from day one  
126 to two. According to the pH map (Fig. 2), the pH changed after one and two days of  
127 incubation. After one day of incubation, pH increased in the area around *Xanthomonas* and  
128 *Stenotrophomonas*, as compared to the pH of 50% TSA medium-based agar (indicated by  
129 black arrow, Fig 2). Simultaneously, the pH in parts of the *Paenibacillus* colony periphery not  
130 facing the interaction zone decreased to ~ pH 6.5. No change in pH was observed close to  
131 *Microbacterium* colonies. After two days of incubation, the pH in the interaction zone  
132 increased to pH >8. At the periphery of the *Paenibacillus* colony opposite the interaction  
133 zone, the pH was still below pH 8. The pH data showed that *Xanthomonas* and  
134 *Stenotrophomonas* alkalized the environment when cultured with TSB as the nutrient source,  
135 whereas *Paenibacillus* acidified its environment. No clear trend was observed for  
136 *Microbacterium*.

137 The O<sub>2</sub> concentration map indicated strong O<sub>2</sub> depletion by *Stenotrophomonas*, *Xanthomonas*  
138 and *Microbacterium* after one and two days of incubation, where the central parts of these  
139 colonies reached anoxia. In contrast, only a weak O<sub>2</sub> depletion was recorded near the  
140 periphery of the *Paenibacillus* colony, after both one and two days of incubation.

141 *Measurement of pH and growth in liquid co-cultures*

142 With the opposing trend of pH drift from *Stenotrophomonas* and *Xanthomonas* compared to  
143 *Paenibacillus*, it was hypothesised that environmental pH stabilisation, similar to that  
144 observed by Gore and colleagues (14, 15), could also be a driver for the observed community  
145 synergy observed by Ren et al. (31) and Hansen et al. (33) in static liquid cultures. Mono-,  
146 dual- and four-species cultures were grown in 24-well polystyrene plates with measured  
147 endpoint pH and individual counts of colony forming units (CFU) from all species.  
148 Oppositely to Ren et al. (31) who specifically quantified the biofilm constituents (bacterial  
149 biofilm cells and biofilm matrix), the present study quantified cell content in the entire well,  
150 as selective pH measurements in the biofilm fraction of 24 well plates were impractical. In  
151 line with the observations by Ren et al. (31), *Xanthomonas* was the most abundant species in  
152 the four-species community contributing >95% of the total cell counts (Fig. 3a). The four-  
153 species consortium yielded higher total CFU counts than the best single species culture, e.g.  
154 *Xanthomonas*, and counts equalled the sum of single species, indicating some level  
155 community synergy (Fig. 3b). Cell counts of *Xanthomonas* and *Paenibacillus* were higher in  
156 the four-species consortium as compared to their respective mono-cultures. Oppositely, cell  
157 counts of *Stenotrophomonas* and *Microbacterium* were reduced when included in the four-  
158 species consortium (Fig. 3c). Similar to the observations from agar plates, *Xanthomonas* and  
159 *Stenotrophomonas* alkalisied the medium when cultured individually in TSB, driving pH  $\geq 8$ ,  
160 whereas *Paenibacillus* produced acid, driving pH  $< 6$  (Fig 3d, e and Fig. S3). In contrast to the  
161 observations from agar plates, a slight acidification by *Microbacterium* was detected in static  
162 liquid TSB cultures (Fig. S3).



163 When comparing end-point pH and CFU counts of individual species in mono-, dual- and  
164 four-species cultures, it was apparent that different species compositions resulted in unique  
165 end-point pH and CFU counts for each culture, as seen by e.g. endpoint pH and CFU counts  
166 of *Xanthomonas* or *Paenibacillus* (Fig 3d, e, respectively). For *Xanthomonas*, the mono-culture  
167 or co-cultivation with either *Stenotrophomonas* or *Microbacterium* resulted in endpoint pH  $\geq 8$   
168 and lower CFU counts of *Xanthomonas*, compared to cultures including the acid-producer  
169 *Paenibacillus*. Co-cultivation of *Xanthomonas* and *Paenibacillus* or as part of the four-species  
170 consortium resulted in significantly higher CFU and lower endpoint pH. In support, a  
171 Spearman's ranked correlation showed a significant (p-value = 0.0058) weak negative  
172 correlation ( $Q_{\text{Spearman}} = -0.38$ ) between pH and CFU, indicating that higher pH lead to reduced  
173 CFU counts (Fig. 3d).

174 For *Paenibacillus* (Fig. 3e), an opposite trend was observed as co-cultivation with the strong  
175 alkali-producers, e.g. *Stenotrophomonas* or *Xanthomonas*, yielded higher CFU counts, and co-  
176 cultivation in the four-species consortium resulted in the significantly highest *Paenibacillus*  
177 CFU counts. A strong positive ( $Q_{\text{Spearman}} = 0.82$ ) and significant (p-value < 0.0001) Spearman's  
178 ranked correlation indicated a positive relationship between endpoint pH and CFU. While  
179 co-cultivation of *Xanthomonas* or *Paenibacillus* with other species or each other generally  
180 resulted in increased CFU counts, co-cultivation of *Stenotrophomonas* or *Microbacterium* with  
181 other species generally affected the growth of *Stenotrophomonas* or *Microbacterium* negatively  
182 (Fig. S3a, b). Hence, other factors than pH are also important for the community growth. No  
183 statistically significant Spearman's correlation was found between pH and CFU counts for  
184 *Microbacterium* and *Stenotrophomonas*.

185 *Stabilisation of pH over time*

186 Measurements of endpoint pH and CFU showed a general trend that co-cultivation of  
187 *Paenibacillus* or/and *Xanthomonas* stabilized pH between the observed extremes of their  
188 respective mono-cultures, while simultaneously yielding increased CFU counts. To verify  
189 that the pH stabilisation occurred throughout the cultivation period and was not just an  
190 endpoint artefact, pH was measured over time in mono-cultures of *Xanthomonas*,  
191 *Paenibacillus* and the four-species culture with measurements every 5 minutes over 48 hrs. In  
192 *Xanthomonas* mono-cultures pH was raised to above 8 within the first day, while  
193 *Paenibacillus* mono-cultures acidified the environment to pH 5 within the same time frame.  
194 In contrast, growth of the four-species consortium stabilised pH between pH 6 and 8 (Fig.  
195 3f). To evaluate the optimal pH growth range of the individual species, each species was  
196 spotted onto pH stabilized 50% TSA plates (Fig. S4). *Stenotrophomonas* and *Xanthomonas* were  
197 able to grow at pH 6-8, with no visible growth below pH 6 and above pH 8. *Microbacterium*  
198 and *Paenibacillus* grew well between pH 6 and 8, with reduced growth between pH 8 and 9.  
199 No growth was recorded for *Microbacterium* or *Paenibacillus* below pH 6.  
200 As *Xanthomonas* and *Paenibacillus* were also able to mutually enhance each other's growth in  
201 dual-culture, pH was continuously measured in this dual-culture to verify that they would  
202 also cause pH stabilisation over time. The pH stabilisation was indeed observed, indicating  
203 that at least part of pH stabilisation was facilitated through the growth of these two species  
204 together (Fig. S5). Complementary measurements showed that the pH stabilisation occurred  
205 simultaneously throughout the entire well, as no spatial pH gradients were found between  
206 top and bottom (data not shown).

207 As tryptic soy broth (TSB) is rich in peptides, the observed pH increase for *Xanthomonas* and  
208 *Stenotrophomonas* cultures was believed to be caused by the release of ammonia from peptide  
209 degradation. Ammonia production was quantified by performing endpoint ammonium  
210 measurements after two days of growth, as proton uptake by ammonia would lead to  
211 formation of ammonium (Supplementary section on “Nitrogen flux and its impact on  
212 community composition”, specifically Table S1 and Fig. S6). Mono-cultures of *Xanthomonas*  
213 and *Stenotrophomonas* contained significantly higher concentrations of ammonium (p-value <  
214 0.05, Table S1 and Fig. S6) than those found in TSB, indicating that the change in pH was  
215 caused by active degradation of amino acids and release of ammonia. A significantly higher  
216 concentration of ammonium was also measured for the four-species consortium (Table S1  
217 and Fig. S6).

218 We expect the observed pH decrease in *Paenibacillus* cultures to be the result of a  
219 fermentative metabolism. When tested by Hugh-Leifson test *Paenibacillus* shows acids  
220 production under anaerobic conditions supporting its ability to perform fermentation (data  
221 not shown), additionally genome analysis has revealed the genomic potential for lactate  
222 production (data not shown). As a potential fermentative metabolism would be favoured in  
223 an anoxic environment, oxygen profiles were made on the 24 wells plates over time. Oxygen  
224 profiles showed that oxygen was depleted within the first 1 hrs of inoculation for all single-  
225 and the four-species cultures in 24 well plates (data not shown). As the environment turned  
226 anoxic, growth of the non-fermenting species *Xanthomonas*, *Stenotrophomonas* and  
227 *Microbacterium*, would have to rely on alternative electron acceptors. Nitrogen flux of nitrate,  
228 nitrite and nitrous oxide was measured in the cultures, and has been summarized in Table  
229 S1 and Fig. S6. In short, *Xanthomonas*, *Paenibacillus* and *Microbacterium* were found to respire

230 on nitrate, which was believed to allow continued growth of these species after oxygen  
231 depletion. A more detailed description of nitrogen flux and a complementary genome  
232 analysis of each species is available in the supplementary text section “Nitrogen flux and its  
233 impact on community composition”. We speculate that *Stenotrophomonas* was the least fit to  
234 thrive in the community, as it lacked the ability to perform anaerobic dissimilatory nitrate  
235 respiration, as compared to the other species.

### 236 *Stability of the pH related interaction*

237 The observed pH related interaction resembled the phenomenon reported by Gore and  
238 colleagues (14, 15) where bacteria with opposite pH drive can stabilise each other’s growth,  
239 referred to as stabilization. To address the stability of the pH related interaction, counts of  
240 individual species and end-point pH were collected for mono and co-cultures in varying  
241 strength of TSB and with M9 and LB media as alternative nutrient sources. LB was included  
242 due to its complexity, to address if the pH synergy would prevail in other types of complex  
243 media. M9 was made with 0.5% tryptone and 0.5% glucose to have a defined and simple  
244 growth medium. CFUs and pH were assessed for mono- and four-species cultures after both  
245 24 and 48 hrs of incubation, whereas CFUs and pH for dual-species combinations were only  
246 assessed at 48 hrs. Glucose concentrations found in the tested media are within the range of  
247 carbohydrates in soil (0.1% (37) to 10% (38)), with M9 having 0.5% and TSB 0.25% glucose.  
248 Across media variants and time points, *Xanthomonas* was generally among the species with  
249 the highest single species counts (Fig. S9) and in the four-species community it was  
250 consistently the most abundant member (Fig. S10). *Xanthomonas* (Fig. 4a, b and Fig. S11) and  
251 *Stenotrophomonas* (Fig. S12) increased pH in all tested media after 48 hrs, while *Paenibacillus*

252 (Fig. 4c, d and Fig. S13) caused acidification in both TSB and LB, but not in M9.  
253 *Microbacterium* (Fig. S14) slightly acidified TSB based media and increased the pH in LB  
254 medium. No clear trend was observed in M9 for *Microbacterium*. The observed synergy from  
255 full strength TSB was found to cease with decreasing TSB concentrations, with summed  
256 CFU counts of the four-species community in 50% and 20% TSB not being significantly  
257 higher than counts of the best single species. At 48 hrs and in 50% TSB the four-species  
258 community still had higher average counts than the best single species, indicating that the  
259 synergistic interaction to some extent was still in play (Fig. S15). The CFU based synergy  
260 was detected in LB medium at 24 hrs, but not at 48 hrs. No synergy was observed when the  
261 four-species community was grown in M9 media. Hence, the synergy seemed highly media  
262 and concentration dependent.

263 As *Xanthomonas* and *Paenibacillus* were hypothesised to be the main drivers behind the  
264 observed pH interaction mediating the synergy, analysis of end-point pH and CFU across  
265 co-cultures and media for these two species was applied to unravel when the pH related  
266 effect disappeared with decreasing media concentration. For *Xanthomonas* (Fig. 4a-b) the  
267 positive effect observed during co-cultivation in full strength TSB disappeared in 50% and  
268 20% TSB, yielding comparable CFU counts for mono- and co-cultures. Hence, the pH-related  
269 effect ceased with decreasing media concentration for *Xanthomonas*. For *Paenibacillus* (Fig. 4c-  
270 d) a significant Spearman's ranked correlation ( $Q_{\text{Spearman}} = 0.539$ ,  $p\text{-value} < 0.001$ ) was found  
271 between CFUs and pH in 50% TSB, with co-cultures of e.g. *Stenotrophomonas* and the four-  
272 species culture also providing significantly higher CFU counts. Combined, this indicated a  
273 continued relationship between pH stabilisation and increased CFUs. For 20% TSB the pH-

274 mediated interaction also ceased for *Paenibacillus*, as co-cultivation yielded comparable CFU  
275 counts to that of mono -cultures.

276 *Xanthomonas* and *Paenibacillus* was found to be the main drivers for the community synergy  
277 from full strength TSB having a pH stabilizing interaction. However, the pH related  
278 interaction between *Xanthomonas* and *Paenibacillus* was observed to be both media and  
279 concentration dependent, with high nutrient loadings being required for the interaction to  
280 occur. In support of an interaction between *Xanthomonas* and *Paenibacillus*, CFUs of  
281 *Xanthomonas* and *Paenibacillus* showed a significant strong positive Pearson's correlation  
282 ( $r_{\text{Pearson}} = 0.87$  ;  $p\text{-value} < 0.001$  ) between resulting CFUs and increasing concentrations of  
283 TSB (Fig. 4e), indicating that these two species followed each other's growth when co-  
284 cultured as part of the four-species community. In contrast, neither counts of *Xanthomonas*  
285 nor *Paenibacillus* showed a correlation to counts of *Stenotrophomonas* (Fig. S16). To further  
286 emphasise the relationship between *Xanthomonas* and *Paenibacillus*, the growth of these two  
287 species showed a strong positive significant Pearson's correlations with each other across  
288 time points in the four-species community when cultured in full strength TSB and 50 % TSB  
289 (Fig. 4f). This kind of relationship, with a co-increase of counts across time and across  
290 different strengths of TSB, was unique for *Xanthomonas* and *Paenibacillus* and could not be  
291 identified for any other combination of species in the four-species community (Fig. S17). For  
292 20% TSB, the positive interaction between these two species was not detected and higher  
293 CFUs of *Xanthomonas* lead to decreased *Paenibacillus* counts over time.

294 Of all the four species, *Paenibacillus* responded most strongly to pH alterations in the  
295 cultures, with a positive correlation between pH and CFUs for full strength TSB and 50%  
296 TSB. In additional support of the pH trend for *Paenibacillus*, counts of CFUs in LB and M9

297 decreased with increasing pH (for pH > 7.5-8) (Fig. S13), emphasising that the growth of  
298 *Paenibacillus* was tightly linked to pH.

### 299 *Bacterial induced pH drift in soil*

300 Currently, the pH mediated interaction has only been presented for *in vitro* systems, and as  
301 such is only speculative for *in vivo* settings e.g. the rhizosphere associated biofilm  
302 communities. To address whether the four species could cause pH alternations in the more  
303 natural like systems, pH drive was investigated in bulk soil inoculated with high  
304 concentrations of either of the single-species or the four-species cultures. The individual  
305 species and the four-species community were inoculated in 5 g of sieved soil with a cell  
306 loading of  $10^9$  cells per gram of soil. Samples were incubated for eight days, with a vortex  
307 induced re-distribution of the soil every second day, before pH was measured in bulk soil  
308 (Fig. 5a). All four bacterial species and the four-species consortium were found to  
309 significantly increase the pH in bulk soil after eight days of incubation, with *Xanthomonas*  
310 promoting the highest increase relative to the control without added bacteria. Plate-  
311 spreading of the samples allowed a visual verification of the presence of all four single  
312 species in their respective soil samples by colony morphology (data not shown). Similarly  
313 *Xanthomonas*, *Stenotrophomonas* and *Microbacterium* could be identified from the plated soil  
314 sample inoculated with the four-species consortium (data not shown).

315 Following the pH drift over time in the four-species community and in mono-species  
316 cultures of *Xanthomonas* with different cell loadings, showed that most of the pH drift  
317 occurred on the first day after inoculation (Fig. 5b). High cell-loadings were required for the  
318 effect to occur in bulk soil, as cell loadings below  $10^9$  cells per gram of *Xanthomonas* did not  
319 provide a significantly increased pH at day 8. Selective CFU counts of *Xanthomonas* were

320 acquired over time to follow the *Xanthomonas* population in mono-species inoculations in  
321 the soil or when inoculated into the soil as part of the four-species community. Counts  
322 showed that the *Xanthomonas* population was stable from day 0 to 2, and thereafter declined  
323 (Fig. S18). Inoculation of either *Xanthomonas* ( $10^9$  cells per gram) and or the four-species  
324 community (with a total of  $10^9$  cells per gram) in autoclaved soil also yielded an increased  
325 pH in bulk soil after eight days of incubation (Fig. S19). *Xanthomonas* could be selectively  
326 isolated from the autoclaved soil samples after inoculation and over time (data not shown).

## 327 Discussion

328 In the present study, we explored the potential drivers behind a previously observed  
329 synergistic interaction between four co-isolated soil bacteria. Opposite pH drive between  
330 key community members was found to stabilise the pH environment promoting enhanced  
331 growth of selected community members. This mechanisms is very much in line with the  
332 type of stabilization presented by Ratzke and Gore (2018) (14). However, other mechanisms  
333 besides pH stabilisation could also be in play for the synergy in full strength TSB, as the  
334 four-species community had higher total cell counts than the dual-species combination of  
335 *Xanthomonas* and *Paenibacillus* where pH stabilisation was also observed. The low cell counts  
336 of *Microbacterium* and *Stenotrophomonas* in the four-species community are expected to only  
337 cause a negligible pH drive, and the presence of these two isolates might have additional  
338 functions in the community. In support, Liu et al. 2017 (32) have shown that inclusion of the  
339 *Microbacterium* caused a unique spatial structuring in the four-species community when  
340 grown as biofilms under continuous flow. Additionally, cross-feeding on specific amino  
341 acids has been suggested/identified as driver for this community in earlier studies (33, 39).



342 Application of a custom-built x-y-z motorized micro-manipulator setup fixed with micro-  
343 sensors enabled us to easily elucidate the interaction of key members in the community by  
344 simply addressing a visual interaction on agar plates. Application of micro-sensors to study  
345 chemical gradients is a long established technique which has seen diverse application, e.g.  
346 within soil sediments (40) or microbial encapsulation in alginate beads (41, 42). Agar plates  
347 are routinely used to screen for bacterial interactions and with the diverse range of bacteria  
348 which cause pH drift in standard laboratory media (15) one should remember to evaluate  
349 the likelihood of pH mediated interaction. Future efforts could apply supporting techniques  
350 directly on the agar plates to identify the metabolites causing the interaction, by e.g. utilizing  
351 imaging mass spectrometry (43, 44) or chemical imaging (45, 46).

352

353 Cellular pH homeostasis is crucial for maintaining functional cells, as intra-cellular proteins  
354 function optimally within distinct pH ranges, and because the proton motive force is crucial  
355 for bacterial respiration (47, 48). Thus, pH stress can lead to reduced or impaired growth due  
356 to defective proteins, a disrupted membrane potential, or the energy cost of maintaining pH  
357 homeostasis (47, 49, 50). Changes caused in the pH environment through bacterial growth  
358 and its effect on growth of co-cultured bacteria is a well-known fact, with one of the best  
359 examples being the syntrophic relationship of *Lactobacillus bulgaricus* and *Streptococcus*  
360 *thermophiles* during yoghurt production (26–29). Hence, that bacteria affect each other by  
361 altering the pH environment through their metabolism is not a surprise. Nevertheless, the  
362 formulation and predictability of pH drive as a type of inter-species interaction in co-  
363 cultures seems not properly established until the recent presentation by Ratzke and Gore  
364 (2018) (14). Whether this type of interaction is relevant for natural settings needs to be

365 further established as Ratzke and Gore (2018) performed *in vitro* studies with selected lab  
366 isolates with known pH drive and pH growth optimum.

367 Unlike the observations presented by Ratzke and Gore (2018) (14), our isolates did not  
368 undergo ecological suicide when tested as single species, but mono-cultures of *Xanthomonas*  
369 and *Paenibacillus* contained lower cell counts compared to those of co-cultures of e.g.  
370 *Xanthomonas* and *Paenibacillus* or the four-species community. We found that the pH related  
371 interaction was highly media specific and only occurred in high nutrient concentrations. By  
372 example, in high media concentration (full strength TSB) both *Xanthomonas* and *Paenibacillus*  
373 benefitted from co-cultivation with partners with opposite pH drive (Fig 3.) With medium  
374 strength TSB only *Paenibacillus* significantly benefitted from co-cultivation with members  
375 with opposite pH drive, e.g. *Stenotrophomonas* or as part of the four-species community (Fig.  
376 4). Hence, with decreasing media strength the interaction faded, suggesting that this type of  
377 positive interaction occurs when nutrients is not a limiting factor. When nutrient  
378 concentrations are lowered, competition for nutrients becomes a stronger driver in the  
379 community, than the positive impact from e.g. pH stabilisation. Notably, this type of  
380 interaction might also be stronger in structured systems, such as microbial biofilms, as  
381 cooperation has been noted as being stronger in structured environments (17) and  
382 cooperating biofilm members tend to evenly mix or co-localise (32, 51, 52). In support,  
383 previous studies on biofilms have shown that steep pH gradients can occur within (53) and  
384 on the outside (54) of biofilms, generating suitable micro-niches for a diverse set of  
385 community members (55).

386 In perspective to the observations by Ratzke and Gore (2018) (14), and hinting towards the  
387 relevance of this type of interactions in natural systems, we observed that pH stabilisation

388 was at least part of the driver behind a previously observed community synergy between  
389 our four co-isolated species which are known to form biofilm. As these species were co-  
390 isolated from the same decomposing leaf (56), it is likely that they could also occur together  
391 in nature and might be able to favour each other's growth through pH stabilisation in  
392 microenvironments under the right conditions. In further support, we observed a pH drive  
393 in bulk soil when inoculated with high concentrations of cells, which indicate that i) these  
394 bacteria can utilize the nutrients in soil to cause pH drift and ii) a strong pH drift occur in  
395 the immediate vicinity (the local micro-environment) of the bacteria in the soil as microbial  
396 growth will be centralised around aggregates of nutrients in the soil. Hence, it can be  
397 speculated that pH stabilisation might act as a driver for community growth in natural  
398 systems, where co-localisation of members creating suitable pH niche for growth can  
399 enhance ones fitness in the community.

## 400 Experimental procedures

### 401 *Bacterial cultures and strains*

402 The investigated four-species model community was composed of *Stenotrophomonas*  
403 *rhizophila*, *Xanthomonas retroflexus*, *Microbacterium oxydans* and *Paenibacillus amylolyticus*.  
404 These isolates were identified during a previous study on plasmid transfer among soil  
405 isolates(56) and were later found to exhibit synergistic biofilm formation (31). Bacterial  
406 isolates were stored as glycerol stocks at -80°C. From the stocks, the bacterial isolates were  
407 streaked onto agar plates containing 1.5% agar-agar (VWR) and 30 g L<sup>-1</sup> tryptic soy broth  
408 (VWR) (TSA). Plates were incubated for 48 hrs at 24°C. Single colonies were used to  
409 inoculate 5 mL tryptic soy broth, 30 g L<sup>-1</sup> tryptic soy broth (VWR) (TSB). 5 mL cultures were  
410 incubated over night at 250 rpm at 24°C.

#### 411 *Cultivation in 24 well plates*

412 For experiments with full strength TSB, over-night bacterial cultures were directly diluted to  
413 an optical density at 600 nm ( $OD_{600}$ ) of 0.15 before use in either TSB or, where noted, in TSB  
414 complemented with 5 mM nitrate. For testing the effect of media composition, diluted  
415 variants of TSB were included along with LB broth (LB) and a mixed minimal medium (M9).  
416 LB (25 g L<sup>-1</sup>; LB broth (Miller) ; VWR) was included due to its complexity, to address if the  
417 pH synergy would occur in other complex media types. M9 (10.5 g L<sup>-1</sup>; M9 broth ; Sigma-  
418 Aldrich) was complemented with 0.5% (w/v) tryptone (Tryptone enzymatic digest from  
419 casein ; Sigma-Aldrich) and 0.5% (w/v) glucose (D(+)-Glucose ; Merck) as the nitrogen and  
420 carbon sources to have a limited media. For preparation of cell cultures for the different  
421 media variants, cells from over-night cultures were precipitated by centrifugation at 5000g  
422 for 5 min. The supernatant was discarded, and cells were washed in 0.9% NaCl (w/v) before  
423 re-dissolving the cells. Cells were re-precipitated by centrifugation and the supernatant was  
424 discarded before the cell were re-dissolved in the appropriated media. Cultures were then  
425 adjusted to an  $OD_{600}$  of 0.15 before use.  $OD_{600}$  adjusted cell cultures were used to inoculate 24  
426 well plates with mono- and co-cultures. All wells contained a total of 2 mL of  $OD_{600}$  adjusted  
427 culture. For mono-species cultures, 2 mL of the single species culture was used, while equal  
428 volumes of each species were used for co-cultures. Inoculated plates were incubated under  
429 static conditions for up to 48 hrs at 24°C.

430 For CFU counts from 24 well plates, cultures were homogenized with a pipette and diluted  
431 in 1xPBS. Diluted culture was plated on TSA (15 g L<sup>-1</sup> agar powder (VWR) and 30 g L<sup>-1</sup> tryptic  
432 soy broth (Sigma-Aldrich)) plates complemented with 40 µg mL<sup>-1</sup> congo red (Fluka), and 20  
433 µg mL<sup>-1</sup> Coomassie brilliant blue G250 (Sigma-Aldrich). Colony forming units was counted

434 after 48 hrs of incubation at 24°C by differentiating species based on dissimilar colony  
435 morphology.

#### 436 *Agar plates*

437 All experiments, including pH and O<sub>2</sub> measurements, performed on agar plate colonies was  
438 performed on 50% TSA plates (15 g L<sup>-1</sup> agar powder (VWR) and 15 g L<sup>-1</sup> tryptic soy broth  
439 (Sigma-Aldrich)). Plates for visualization of morphological changes were 50% TSA plates  
440 complemented with 40 µg mL<sup>-1</sup> congo red (Fluka) and 20 µg mL<sup>-1</sup> coomassie brilliant blue  
441 G250 (Sigma-Aldrich), referred to as Congo Red plates.

442 Colony spotting for pH and O<sub>2</sub> measurements was done with a fixed distance between  
443 colony centers. The spotting (interaction zone) area was divided into a grid, with each grid-  
444 square being 2.5 x 2.5 mm. Colonies were spotted with an approximate distance of 1.25 cm  
445 between colony centers. 5 µL of OD<sub>600</sub> 0.15 adjusted cultures (prepared as previously  
446 described) were used for spotting bacterial colonies. Similarly, two-species interaction  
447 studies were performed with an approximate distance of 1.25 cm between the center of the  
448 colonies. 5 µL of OD<sub>600</sub> 0.15 adjusted cultures (prepared as previously described) were  
449 spotted.

450 Buffer stabilized plates were 50% TSA agar plates complemented with 200 mM sodium-  
451 acetate (pH 5 and 5.5), potassium-phosphate (pH 6, 6.5 and 7), Trisma base (pH 7.5, 8, 8.5  
452 and 9), and sodium-carbonate (pH 9.5 and 10.5) buffers.

#### 453 *Data analysis and plotting*

454 Boxplots were plotted using the ggplot2 R package. For boxplot with CFU and pH, box  
455 width was set to 2x the standard error of the measured pH within each group. Statistical

456 significance was inferred between groups e.g. on  $\log_2(\text{CFU counts})$  with a generalised linear  
457 model with Tukey pairwise comparison and multiple hypothesis testing by Single step  
458 method using the multcomp package in the R environment (referred to as GLM) (57).  
459 Spearman's ranked correlations were used to infer correlations between CFU and endpoint  
460 pH, and Pearson's correlations was used to infer correlations between CFU counts of two  
461 species.

### 462 *Soil Samples*

463 Soil from a Danish research field (Taastrup, Denmark, Coordinates; 55.669762, 12.300498)  
464 was sieved for particles < 2mm and the soil was stored cold until use. This soil was chosen as  
465 the bacterial isolates were originally isolated from soil obtained from the same research  
466 facility. Soil samples contained 5g soil, contained in 50 mL Falcon tubes. The soil was  
467 inoculated with 2 mL of bacterial culture with varying inoculation sizes of bacteria. Cells  
468 from over-night bacterial cultures in TSB were precipitated by centrifugation at 5000g for 5  
469 min and the supernatant was discarded. Cells were washed in phosphate buffered saline  
470 (1xPBS) and re-precipitated by centrifugation. Cells were re-dissolved in 2mL 1xPBS and  
471 adjusted to the appropriate  $\text{OD}_{600}$  to provide 2 mL cell suspension with cells to yield e.g.  $10^9$   
472 cell per gram of soil. For mix cultures cells were mixed in equal proportions to yield a total  
473 of e.g.  $10^9$  cell per gram of soil. Cell suspensions were used to inoculate the 5 g soil samples.  
474 The addition of 2 mL solution left the soil with a very thin water film on top of the soil.  
475 Samples were vortexed for 5 sec. to distribute liquid and bacteria in the soil. Samples were  
476 incubated at 24°C under static conditions. On every second day, the tubes were briefly  
477 vortexed to re-distribute nutrients and cells in the soil. Blank samples without inoculation of  
478 bacteria were prepared by inoculating the soil with 2 mL 1xPBS. For sampling 5 mL sterile

479 water was added to the tubes, and the tubes were shaken for 10 min. before pH was  
480 measured in the water fraction of the sample. To verify the presence of the inoculated  
481 species in the soil 100  $\mu$ L of the water suspension was serial diluted in 1xPBS and plate-  
482 spread on TSA plates complemented with Congo red and Coomassie brilliant blue G250, as  
483 described for 24 well plates. Inoculated species could be recognized by their unique colony  
484 morphology. For selective counts of *Xanthomonas*, agar plates were further complemented  
485 with 20  $\mu$ g mL<sup>-1</sup> Kanamycin.

#### 486 *Microsensor measurements*

487 2D microsensor measurements of pH and O<sub>2</sub> concentration transects across agar plates were  
488 conducted with the microsensors mounted in a custom-built x-y-z motorized  
489 micromanipulator setup fixed to a heavy stand (58). Similar motorized x-y-z  
490 micromanipulator setups can be obtained from commercial sources; e.g. *Pyro-Science GmbH*,  
491 *Aachen, Germany* or *Unisense A/S, Aarhus, Denmark*.

492 For O<sub>2</sub> measurements, a fiber-optic O<sub>2</sub> microsensor (OXR50-HS, tip diameter 50  $\mu$ m) was  
493 connected to an O<sub>2</sub> meter (FireStingO2); both components were obtained from Pyro-Science  
494 GmbH Aachen, Germany (pyro-science.com). Calibration of the microsensor was performed  
495 as specified by the manufacturer by measurements in air saturated and O<sub>2</sub> free water,  
496 respectively.

497 For pH measurements, we used a pH glass microelectrode (tip diameter 50  $\mu$ m, pH50;  
498 Unisense A/S) in combination with a reference electrode (tip diameter of ~5 mm; Unisense  
499 A/S) immersed in the agar plate. Both sensors were connected to a high impedance pH/mV-  
500 Meter (Unisense A/S). Before measurements commenced, the pH microelectrode was  
501 linearly calibrated from sensor mV readings in three pre-known pH buffers (pH 4, 7 and 9)

502 showing a log-linear response to  $[H^+]$  of  $\sim 51$  mV/pH unit at experimental temperature ( $24^\circ\text{C}$   
503  $\pm 0.5^\circ\text{C}$ ).

504 For  $\text{N}_2\text{O}$  measurements, a microsensor (tip diameter  $50\ \mu\text{m}$ , N2O50; Unisense A/S) was  
505 connected to a PA2000 pico-amperometer (discontinued product from Unisense A/S). The  
506 sensor was pre-activated, polarized and calibrated as stated in the manual using sensor  
507 readings in  $\text{N}_2\text{O}$  free water and then after addition of known amounts of  $\text{N}_2\text{O}$  saturated  
508 water.

509 A USB microscope (dino-lite.eu, model AM7515MZTL) was used to determine when the  
510 microsensor tip touched the surface of the agar plate. All 2D measurements (pH and  $\text{O}_2$ )  
511 were conducted at a depth of  $\approx 100\ \mu\text{m}$  below the surface. A custom-made profiling software  
512 (Volfix; programmed by Roland Thar) was used to control the  $x$ - $y$ - $z$  motorized  
513 micromanipulator and to read out both sensor signals. A similar software, Profix, can be  
514 downloaded free of charge from pyro-science.com. An analog to digital converter (ADC-101;  
515 Pico Technology, UK) had to be used in order to interface the profiling software with the  $\text{O}_2$   
516 meter (using the analog output of the FireStingO2) and the pH/mV-Meter. Time course  
517 measurements, of e.g.  $\text{O}_2$ , in static culture were recorded with free logging software  
518 (SensorTrace logger; Unisense A/S).

## 519 Acknowledgement

520 We thank Annette Løth for assistance with media preparation, Maja Holm Wahlgren and  
521 Professor Anders Primé for their assistance with nitrous oxide measurements, and Peter  
522 Østrup Jensen for assistance with microsensor equipment. We thank Esben Nielsen and  
523 Gosha Sylvester for their assistance with ammonium, and nitrate/nitrite measurements.  
524 Lastly, we thank Jakob Russel for assistance with data handling in the R environment.



## 525 Funding

526 The project was funded by the Danish Council for Independent Research | Natural Sciences  
527 (FNU) & Technology and Production Sciences (FTP) (ID: DFF – 1335-00071; DFF – 4184-  
528 00515; DFF - 12-133360) and by the Villum Foundation (YIP, project no. 10098).

## 529 Conflicts of interest

530 The authors declare no conflicts of interest.

## 531 References

- 532 1. Grover M, Ali SZ, Sandhya V, Rasul A, Venkateswarlu B. 2011. Role of microorganisms in  
533 adaptation of agriculture crops to abiotic stresses. *World J Microbiol Biotechnol* 27:1231–1240.
- 534 2. Edwards SJ, Kjellerup B V. 2013. Applications of biofilms in bioremediation and biotransformation  
535 of persistent organic pollutants, pharmaceuticals/personal care products, and heavy metals. *Appl*  
536 *Microbiol Biotechnol* 97:9909–9921.
- 537 3. Wagner M, Loy A. 2002. Bacterial community composition and function in sewage treatment  
538 systems. *Curr Opin Biotechnol* 13:218–227.
- 539 4. Steidl RJ, Lampa-Pastirk S, Reguera G. 2016. Mechanistic stratification in electroactive biofilms of  
540 *Geobacter sulfurreducens* mediated by pilus nanowires. *Nat Commun* 7:12217.
- 541 5. Suzanne T Read, Paritam Dutta, Phillip L Bond, Jürg Keller KR. 2010. Initial development and  
542 structure of biofilms on microbial fuel cell anodes. *BMC Microbiol* 10:98 (1-10).
- 543 6. Lindemann SR, Bernstein HC, Song H-S, Fredrickson JK, Fields MW, Shou W, Johnson DR, Beliaev  
544 AS. 2016. Engineering microbial consortia for controllable outputs. *ISME J* 10:2077–2084.
- 545 7. Cao H, Chen R, Wang L, Jiang L, Yang F, Zheng S, Wang G, Lin X. 2016. Soil pH, total phosphorus,  
546 climate and distance are the major factors influencing microbial activity at a regional spatial scale.  
547 *Sci Rep* 6:25815.
- 548 8. de Wit R, Bouvier T. 2006. “Everything is everywhere, but, the environment selects”; what did  
549 Baas Becking and Beijerinck really say? *Environ Microbiol* 8:755–758.
- 550 9. Becking LGMB, Canfield DE. 2015. *Baas Becking’s Geobiology*. John Wiley & Sons, Ltd, Chichester,  
551 UK.

- 552 10. He Z, Piceno Y, Deng Y, Xu M, Lu Z, Desantis T, Andersen G, Hobbie SE, Reich PB, Zhou J. 2012. The  
553 phylogenetic composition and structure of soil microbial communities shifts in response to  
554 elevated carbon dioxide. *Isme J* 6:259–272.
- 555 11. Rousk J, Brookes PC, Baath E. 2009. Contrasting Soil pH Effects on Fungal and Bacterial Growth  
556 Suggest Functional Redundancy in Carbon Mineralization. *Appl Environ Microbiol* 75:1589–1596.
- 557 12. Liu S, Ren H, Shen L, Lou L, Tian G, Zheng P, Hu B. 2015. pH levels drive bacterial community  
558 structure in the Qiantang River as determined by 454 pyrosequencing. *Front Microbiol* 6:1–7.
- 559 13. Tripathi BM, Stegen JC, Kim M, Dong K, Adams JM, Lee YK. 2018. Soil pH mediates the balance  
560 between stochastic and deterministic assembly of bacteria. *ISME J* 1–12.
- 561 14. Ratzke C, Gore J. 2018. Modifying and reacting to the environmental pH can drive bacterial  
562 interactions. *PLOS Biol* 16:e2004248.
- 563 15. Ratzke C, Denk J, Gore J. 2018. Ecological suicide in microbes. *Nat Ecol Evol* 2:867–872.
- 564 16. Rhee S-K, Lee S-G, Hong S-P, Choi Y-H, Park J-H, Kim C-J, Sung M-H. 2000. A novel microbial  
565 interaction: obligate commensalism between a new gram-negative thermophile and a  
566 thermophilic *Bacillus* strain. *Extremophiles* 4:131–136.
- 567 17. Pande S, Kaftan F, Lang S, Svato A, Germerodt S, Kost C. 2016. Privatization of cooperative benefits  
568 stabilizes mutualistic cross-feeding interactions in spatially structured environments. *ISME J*  
569 10:1413–1423.
- 570 18. Pande S, Merker H, Bohl K, Reichelt M, Schuster S, de Figueiredo LF, Kaleta C, Kost C. 2014. Fitness  
571 and stability of obligate cross-feeding interactions that emerge upon gene loss in bacteria. *Isme J*  
572 8:953–962.
- 573 19. Yurtsev EA, Conwill A, Gore J. 2016. Oscillatory dynamics in a bacterial cross-protection  
574 mutualism. *Proc Natl Acad Sci U S A* 113:6236–41.
- 575 20. Lee KWK, Periasamy S, Mukherjee M, Xie C, Kjelleberg S, Rice SA. 2014. Biofilm development and  
576 enhanced stress resistance of a model, mixed-species community biofilm. *ISME J* 8:894–907.
- 577 21. Kerr B, Riley MA, Feldman MW, Bohannan BJM. 2002. Local dispersal promotes biodiversity in a  
578 real-life game of rock-paper-scissors. *Nature* 418:171–174.
- 579 22. Soetaert K, Hofmann AF, Middelburg JJ, Meysman FJR, Greenwood J. 2007. The effect of  
580 biogeochemical processes on pH. *Mar Chem* 105:30–51.

- 581 23. Schmidt MWI, Torn MS, Abiven S, Dittmar T, Guggenberger G, Janssens I a., Kleber M, Kögel-  
582 Knabner I, Lehmann J, Manning D a. C, Nannipieri P, Rasse DP, Weiner S, Trumbore SE. 2011.  
583 Persistence of soil organic matter as an ecosystem property. *Nature* 478:49–56.
- 584 24. Ravel J, Brotman RM. 2016. Translating the vaginal microbiome: gaps and challenges. *Genome*  
585 *Med* 8:35.
- 586 25. Burne RA, Marquis RE. 2000. Alkali production by oral bacteria and protection against dental  
587 caries. *FEMS Microbiol Lett* 193:1–6.
- 588 26. Driessen FM, Kingma F, Stadhouders J. 1982. Evidence that *Lactobacillus bulgaricus* in yogurt is  
589 stimulated by carbon dioxide produced by *Streptococcus thermophilus*. *Netherlands Inst Dairy*  
590 *Res.*
- 591 27. Angelov M, Kostov G, Simova E, Beshkova D, Koprinkova-Hristova P. 2009. Proto-cooperation  
592 factors in yogurt starter cultures. *Rev Génie Ind* 3:4–12.
- 593 28. Béal C, Spinnler HE, Corrieu G. 1994. Comparison of growth, acidification and productivity of pure  
594 and mixed cultures of *Streptococcus salivarius* subsp. *thermophilus* 404 and *Lactobacillus*  
595 *delbrueckii* subsp. *bulgaricus* 398. *Appl Microbiol Biotechnol* 41:95–98.
- 596 29. Sieuwerts S, Molenaar D, Van Hijum SAFT, Beerthuyzen M, Stevens MJA, Janssen PWM, Ingham CJ,  
597 De Bok FAM, De Vos WM, Van Hylckama Vlieg JET. 2010. Mixed-Culture transcriptome analysis  
598 reveals the molecular basis of mixed-culture growth in *Streptococcus thermophilus* and  
599 *Lactobacillus bulgaricus*. *Appl Environ Microbiol* 76:7775–7784.
- 600 30. Madsen JS, Sørensen SJ, Burmølle M. 2018. Bacterial social interactions and the emergence of  
601 community-intrinsic properties. *Curr Opin Microbiol* 42:104–109.
- 602 31. Ren D, Madsen JS, Sørensen SJ, Burmølle M. 2015. High prevalence of biofilm synergy among  
603 bacterial soil isolates in cocultures indicates bacterial interspecific cooperation. *ISME J* 9:81–89.
- 604 32. Liu W, Russel J, Røder HL, Madsen JS, Burmølle M, Sørensen SJ. 2017. Low-abundant species  
605 facilitates specific spatial organization that promotes multispecies biofilm formation. *Environ*  
606 *Microbiol* 7.
- 607 33. Hansen LBS, Ren D, Burmølle M, Sørensen SJ. 2016. Distinct gene expression profile of  
608 *Xanthomonas retroflexus* engaged in synergistic multispecies biofilm formation. *ISME J* 1–4.
- 609 34. Herschend J, Damholt ZB V., Marquard AM, Svensson B, Sørensen SJ, Hägglund P, Burmølle M.

- 610 2017. A meta-proteomics approach to study the interspecies interactions affecting microbial  
611 biofilm development in a model community. *Sci Rep* 7:16483.
- 612 35. Köhl M. 2005. Optical microsensors for analysis of microbial communities. *Methods Enzymol*  
613 397:166–199.
- 614 36. Revsbech NP. 2005. Analysis of microbial communities with electrochemical microsensors and  
615 microscale biosensors. *Methods Enzymol* 397:147–166.
- 616 37. Safarik I, Santruckova H. 1992. Direct determination of total soil carbohydrate content. *Plant Soil*  
617 143:109–114.
- 618 38. Mehta NC, Dubach P, Deuel H. 1962. Carbohydrates in the Soil, p. 335–355. *In* .
- 619 39. Herschend J, Damholt ZBV, Marquard AM, Svensson B, Sørensen SJ, Hägglund P, Burmølle M. 2017.  
620 A meta-proteomics approach to study the interspecies interactions affecting microbial biofilm  
621 development in a model community. *Sci Rep* 7.
- 622 40. Walpersdorf E, Köhl M, Elberling B, Andersen TJ, Hansen BU, Pejrup M, Glud RN. 2017. In situ  
623 oxygen dynamics and carbon turnover in an intertidal sediment (Skallingen, Denmark). *Mar Ecol*  
624 *Prog Ser* 566:49–65.
- 625 41. Behrendt L, Schrammeyer V, Qvortrup K, Lundin L, Sørensen SJ, Larkum AWD, Köhl M. 2012. Biofilm  
626 Growth and Near-Infrared Radiation-Driven Photosynthesis of the Chlorophyll d-Containing  
627 Cyanobacterium *Acaryochloris marina*. *Appl Environ Microbiol* 78:3896–3904.
- 628 42. Sønderholm M, Kragh KN, Koren K, Jakobsen TH, Darch SE, Alhede M, Jensen PØ, Whiteley M, Köhl  
629 M, Bjarnsholt T. 2017. *Pseudomonas aeruginosa* Aggregate Formation in an Alginate Bead Model  
630 System Exhibits In Vivo -Like Characteristics. *Appl Environ Microbiol* 83:e00113-17.
- 631 43. Watrous JD, Dorrestein PC. 2011. Imaging mass spectrometry in microbiology. *Nat Rev Microbiol*  
632 9:683–694.
- 633 44. Yang JY, Phelan V V., Simkovsky R, Watrous JD, Trial RM, Fleming TC, Wenter R, Moore BS, Golden  
634 SS, Pogliano K, Dorrestein PC. 2012. Primer on Agar-Based Microbial Imaging Mass Spectrometry.  
635 *J Bacteriol* 194:6023–6028.
- 636 45. Koren K, Jakobsen SL, Köhl M. 2016. In-vivo imaging of O<sub>2</sub> dynamics on coral surfaces spray-  
637 painted with sensor nanoparticles. *Sensors Actuators B Chem* 237:1095–1101.
- 638 46. Elgetti Brodersen K, Koren K, Lichtenberg M, Köhl M. 2016. Nanoparticle-based measurements of

- 639 pH and O<sub>2</sub> dynamics in the rhizosphere of *Zostera marina* L.: effects of temperature elevation and  
640 light-dark transitions. *Plant Cell Environ* 39:1619–1630.
- 641 47. Krulwich T a, Sachs G, Padan E. 2011. Molecular aspects of bacterial pH sensing and homeostasis.  
642 *Nat Rev Microbiol* 9:330–43.
- 643 48. Baker-Austin C, Dopson M. 2007. Life in acid: pH homeostasis in acidophiles. *Trends Microbiol*  
644 15:165–171.
- 645 49. Salmond C V, Kroll RG, Booth IR. 1984. The Effect of Food Preservatives on pH Homeostasis in  
646 *Escherichia coli*. *Microbiology* 130:2845–2850.
- 647 50. Bunse C, Lundin D, Karlsson CMG, Vila-Costa M, Palovaara J, Akram N, Svensson L, Holmfeldt K,  
648 González JM, Calvo E, Pelejero C, Marrasé C, Dopson M, Gasol JM, Pinhassi J. 2016. Response of  
649 marine bacterioplankton pH homeostasis gene expression to elevated CO<sub>2</sub>. *Nat Clim Chang* 1:1–7.
- 650 51. Momeni B, Brileya KA, Fields MW, Shou W. 2013. Strong inter-population cooperation leads to  
651 partner intermixing in microbial communities. *eLife Sci* 1–23.
- 652 52. Liu W, Røder HL, Madsen JS, Bjarnsholt T, Sørensen SJ, Burmølle M. 2016. Interspecific Bacterial  
653 Interactions are Reflected in Multispecies Biofilm Spatial Organization. *Front Microbiol* 7:1–8.
- 654 53. Vroom JM, De Grauw KJ, Gerritsen HC, Bradshaw DJ, Marsh PD, Watson GK, Birmingham JJ, Allison  
655 C. 1999. Depth penetration and detection of pH gradients in biofilms by two- photon excitation  
656 microscopy. *Appl Environ Microbiol* 65:3502–3511.
- 657 54. Schlafer S, Raarup MK, Meyer RL, Sutherland DS, Dige I, Nyengaard JR, Nyvad B. 2011. pH  
658 Landscapes in a Novel Five-Species Model of Early Dental Biofilm. *PLoS One* 6:e25299.
- 659 55. Flemming H-C, Wingender J, Szewzyk U, Steinberg P, Rice SA, Kjelleberg S. 2016. Biofilms: an  
660 emergent form of bacterial life. *Nat Rev Microbiol* 14:563–575.
- 661 56. de la Cruz-Perera CI, Ren D, Blanchet M, Dendooven L, Marsch R, Sørensen SJ, Burmølle M. 2013.  
662 The ability of soil bacteria to receive the conjugative IncP1 plasmid, pKJK10, is different in a mixed  
663 community compared to single strains. *FEMS Microbiol Lett* 338:95–100.
- 664 57. Hothorn T, Bretz F, Westfall P. 2008. Simultaneous Inference in General Parametric Models.  
665 *Biometrical J* 50:346–363.
- 666 58. Lichtenberg M, Nørregaard RD, Kühl M. 2017. Diffusion or advection? Mass transfer and complex  
667 boundary layer landscapes of the brown alga *Fucus vesiculosus*. *J R Soc Interface* 14:20161015.

668  
669

670 Figures

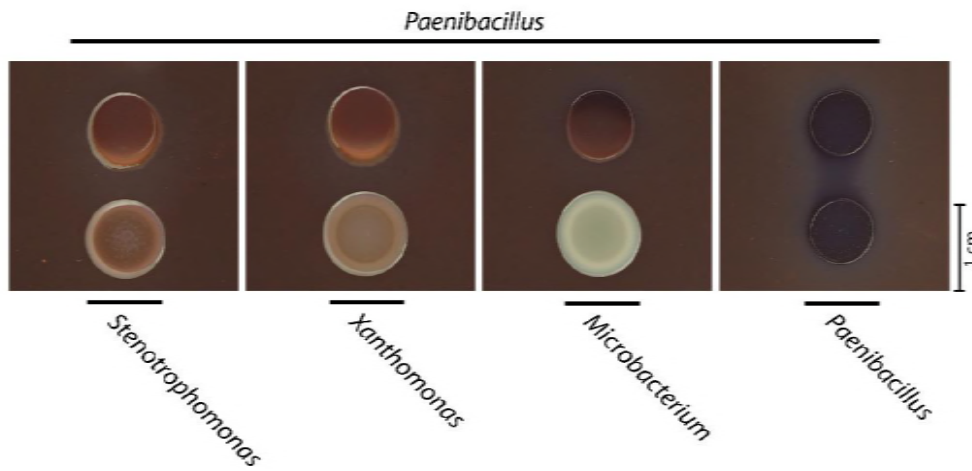

671

672 **Figure 1: Two-species interactions with *Paenibacillus*. *Paenibacillus* colony morphologically**  
673 **changed when spotted close to *Stenotrophomonas*, *Xanthomonas* and *Microbacterium* colonies on**  
674 **Congo red plates. The part of the *Paenibacillus* colony opposing the other species turned light red**  
675 **and grew directionally towards the opposing species. No morphological changes occurred when**  
676 ***Paenibacillus* was spotted against itself.**

677

678

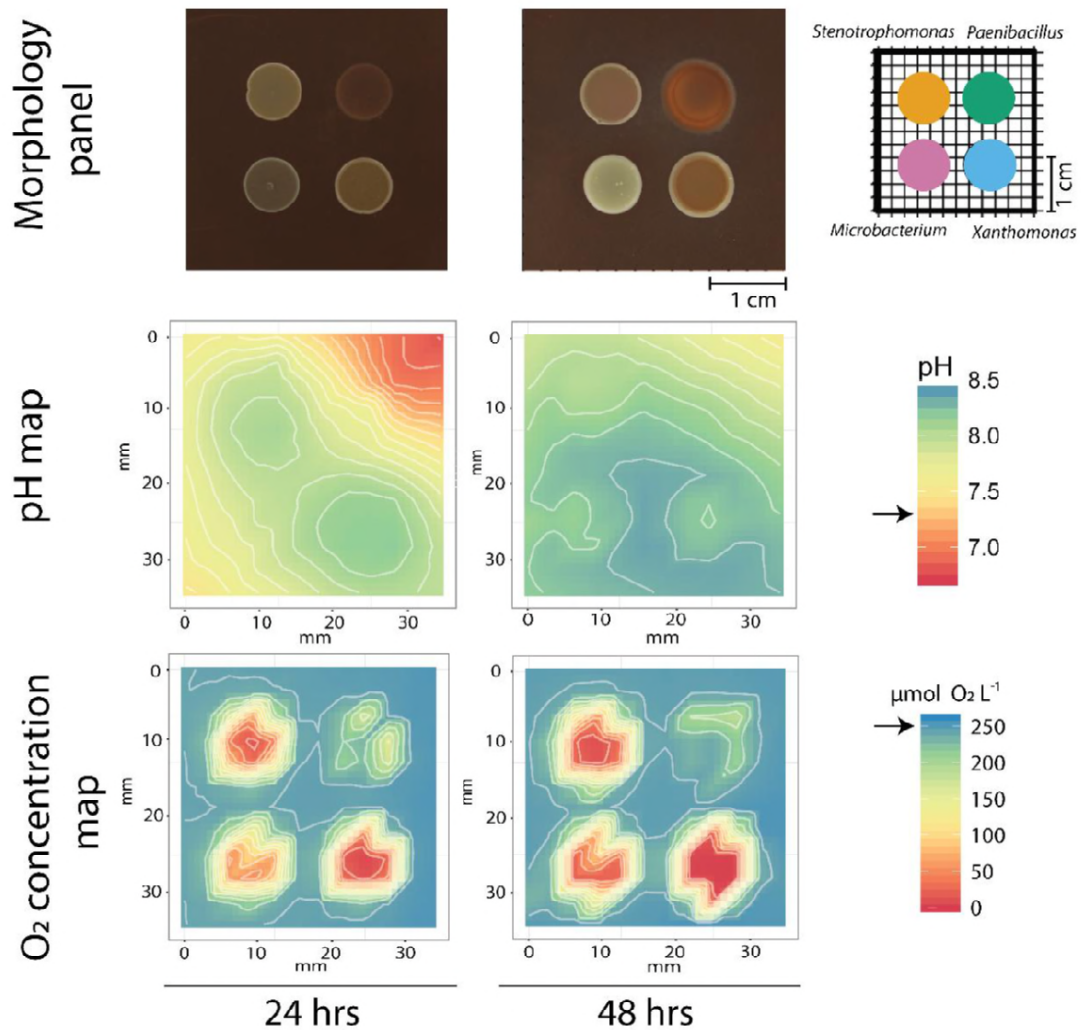

679

680

681 Figure 2: Mapping of O<sub>2</sub> and pH in the interaction zones of *Xanthomonas*, *Stenotrophomonas*,

682 *Microbacterium* and *Paenibacillus* grown on 50% TSA plates. Arrows on legend bars indicate pH

683 and O<sub>2</sub> concentration in 50% TSA agar without bacteria. The pH and O<sub>2</sub> concentrations were

684 measured 100  $\mu\text{m}$  below the surface of the agar at each 2.5 x 2.5 mm grid position. Morphology

685 panels show the interaction of *Paenibacillus* occurring on congo red plates and the positioning of

686 the individual species on the plate. Panels with pH measurements at 24 hours show increased pH



687 around *Stenotrophomonas* and *Xanthomonas* colonies, with an alkalization of the media towards  
688 pH 8. In the periphery of the *Paenibacillus* colony opposite the interaction zone, the agar was  
689 acidified towards pH 6.5. After two days of growth of *Xanthomonas* and *Stenotrophomonas*, the  
690 pH in the majority of the interaction zone was enhanced to pH  $\geq 8.0$ . After 24 and 48 hrs growth,  
691 *Xanthomonas*, *Stenotrophomonas* and *Microbacterium* deprived the agar of O<sub>2</sub>, leaving the  
692 respective colony centres anoxic. Only a small O<sub>2</sub> depletion was measured in the periphery of the  
693 *Paenibacillus* colony.

694

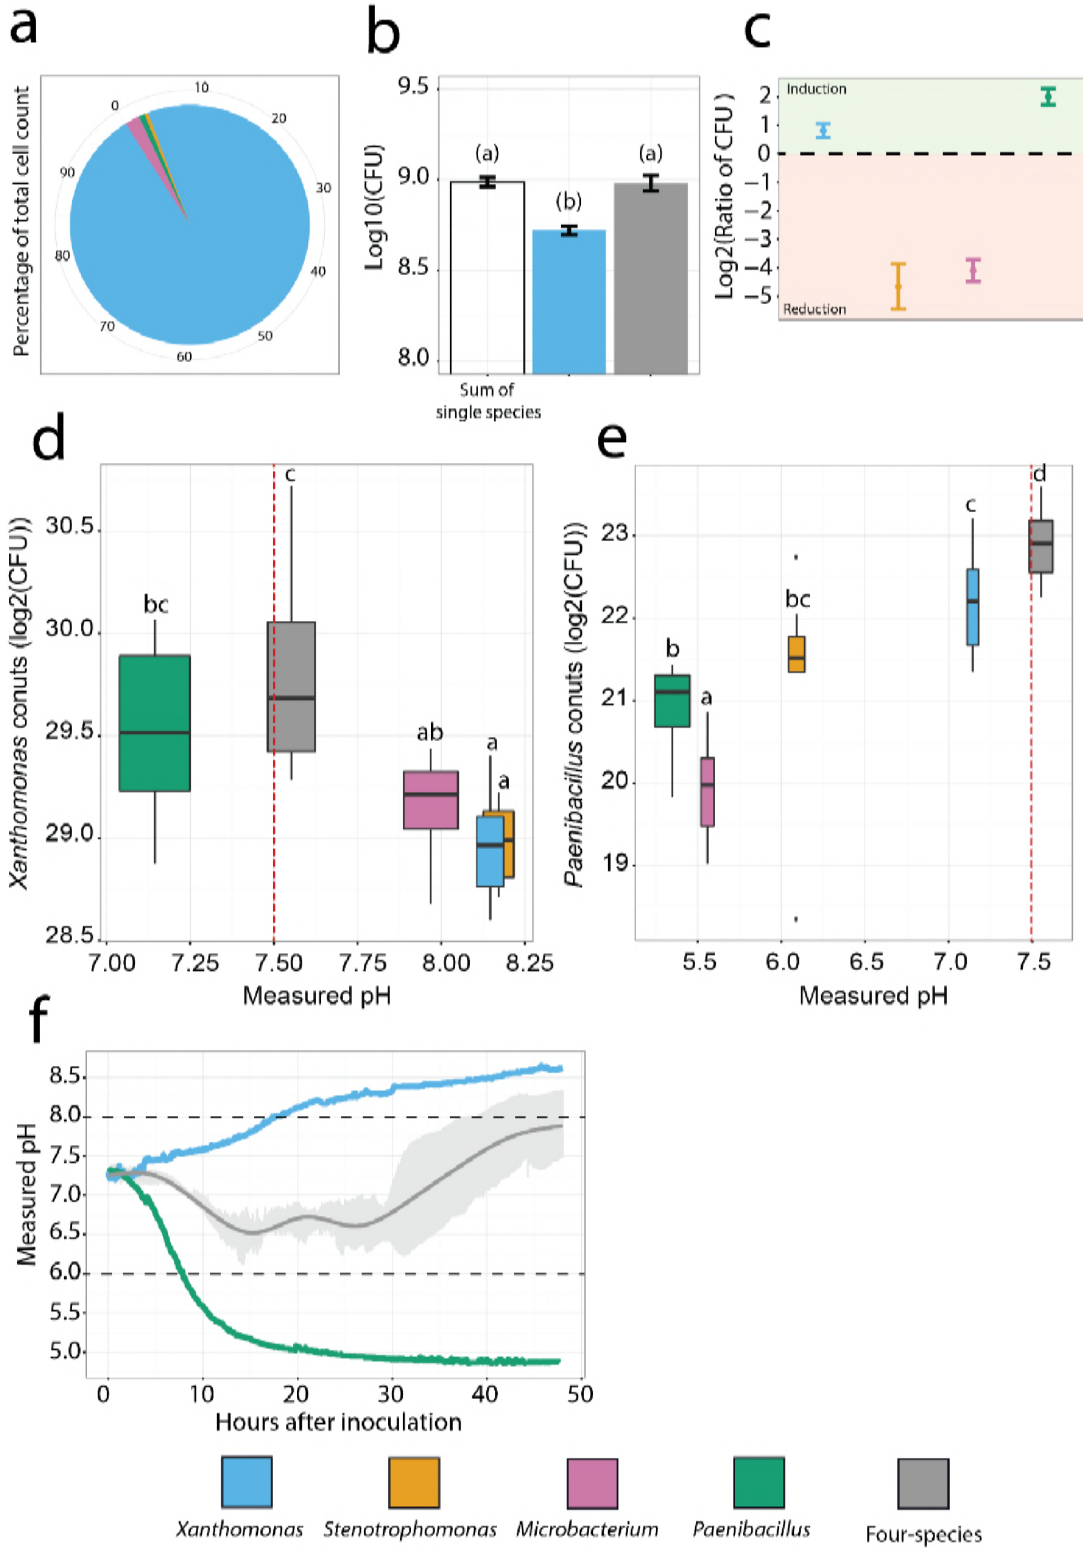

696

697 **Figure 3: Growth and composition of the four-species community, along with its effect on the local**

698 **environment. a) Species distribution based on CFU counts in the four-species community, with**

699 ***Xanthomonas* composing >95% of the four-species community (n = 10 biological replicates). b)**

700 **Community productivity by total cell counts (log<sub>10</sub>(CFU) of the four-species community,**

701 **compared to best single species (*Xanthomonas*) and the sum of single species. Bars indicate**

702 **standard error and dissimilar letters indicate significant differences with p<0.05 (GLM) (n = 10**

703 **biological replicates). c) Species dynamics in the four-species consortium, compared to single**

704 **species populations. Bars indicate standard error. Cell counts of both *Xanthomonas* and**

705 ***Paenibacillus* were higher when co-cultured in the four-species consortium, whereas cell counts of**

706 ***Microbacterium* and *Stenotrophomonas* were reduced (n = 10 biological replicates). d+e) CFU**

707 **counts of *Xanthomonas* and *Paenibacillus* respectively, in mono- and co-cultures, mapped with**

708 **endpoint pH for each culture after 48 hrs of incubation. Spearman's ranked correlation between**

709 **CFU and endpoint pH. Statistical grouping of CFU, with dissimilar letters, e.g. a and b, indicating**

710 **significant differences with p<0.05 (GLM) (n = 10 biological replicates). Box width represents two**

711 **times the standard error of the measured endpoint pH in each culture. Co-cultures are labelled**

712 **with the colours of the included species. Counts of the four-species consortia are labelled in grey.**

713 **Red dotted line represents pH in the media without inoculation. f) Time trace of measured pH**

714 **during growth of *Xanthomonas*, *Paenibacillus* and the four-species consortium. Data from**

715 ***Paenibacillus* and *Xanthomonas* represents a single biological replicate. Additional replicates were**

716 **made to verify the single-species trend, but these are not included in the data representation. Data**

717 **from the four-species consortium represent the smoothed average of three biological replicates**

718 **(dark grey line). Standard deviation for each measured time point is plotted as bars (light grey).**

719 **The dotted lines mark optimal pH growth range for each of the four species, as estimated by**

720 **growth on buffer stabilized 50% TSA plates (supplementary fig. 4).**

721

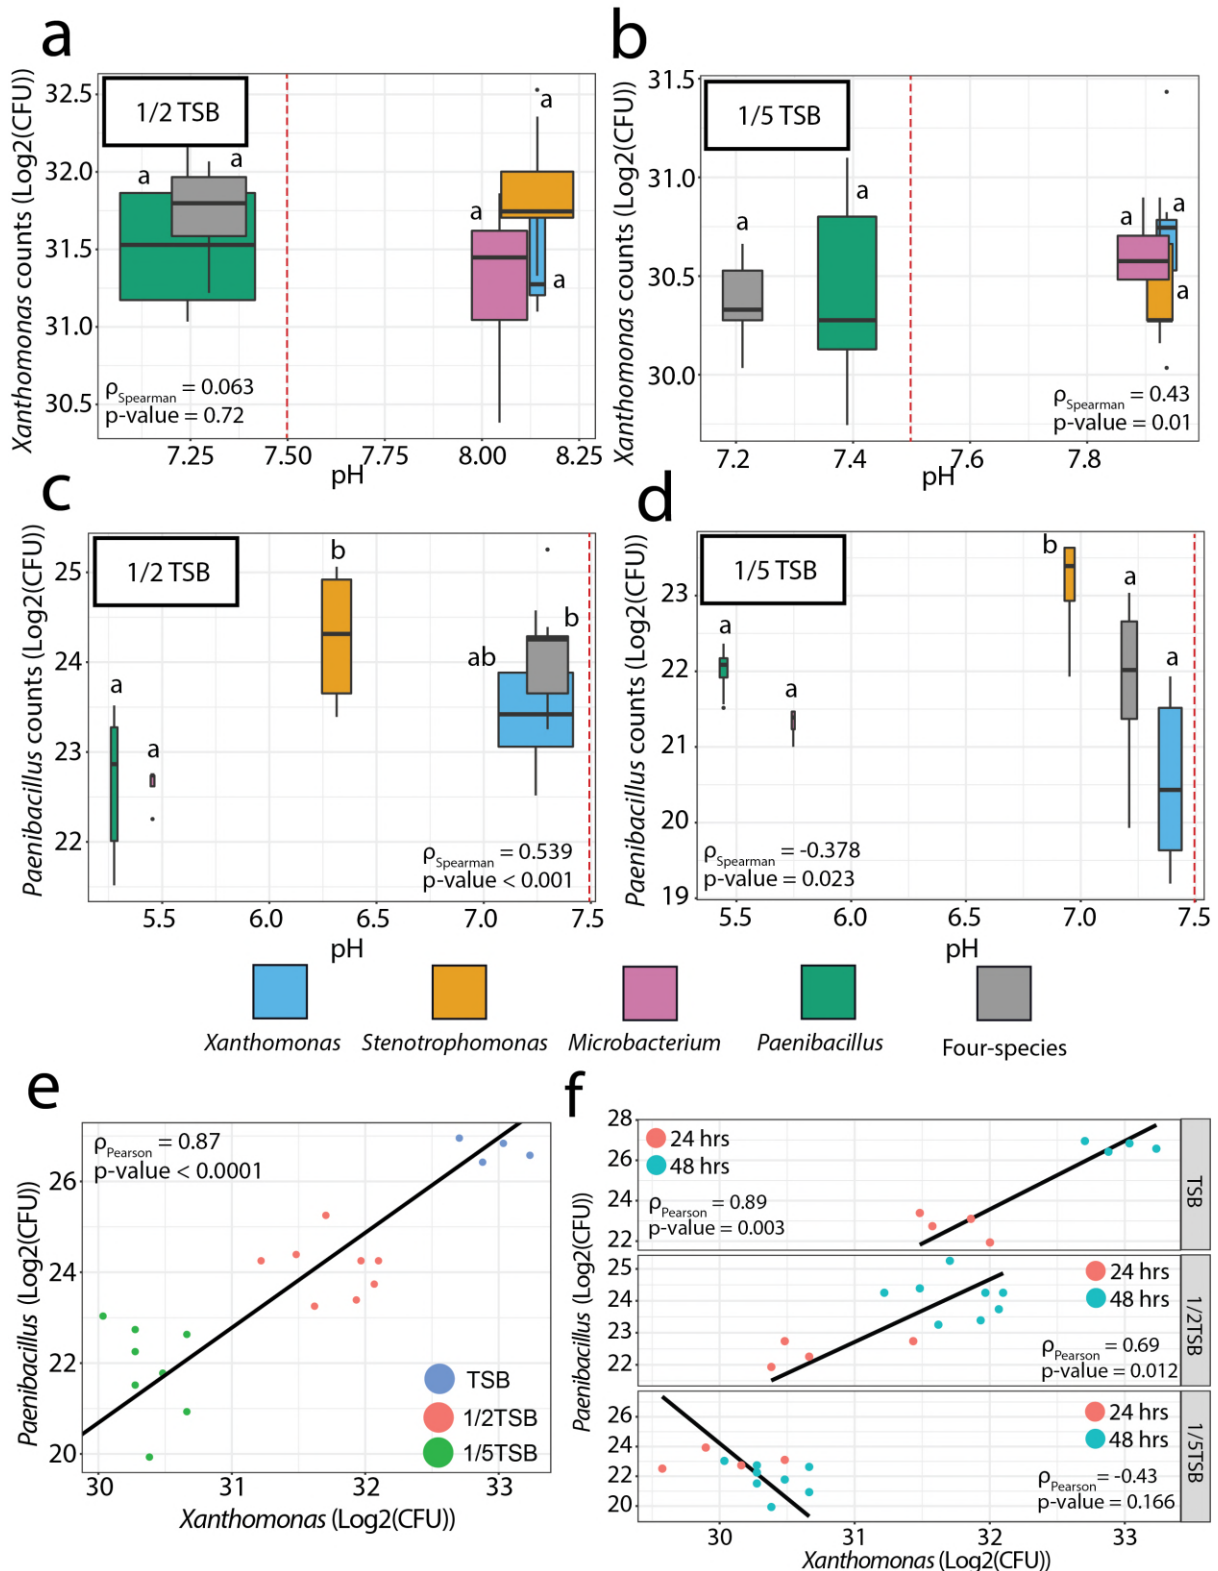

722

723

724 **Figure 4: Growth of *Xanthomonas* and *Paenibacillus* across tested media concentrations. a-d) CFU**  
725 **counts of *Xanthomonas* (a-b) and *Paenibacillus* (c-d) respectively, in mono- and co-cultures with 50**  
726 **and 20% TSB plotted against endpoint pH for each culture after 48 hrs of incubation (n = 8**  
727 **biological replicates, at 48 hrs of growth). Spearman's correlation between CFU and end point pH**  
728 **are presented in each panel. Statistical grouping of CFU is presented by dissimilar letters**  
729 **indicating significant differences with  $p < 0.05$  (GLM). Box width represents two times the**  
730 **standard error of the measured endpoint pH in each culture. Co-cultures are labelled with the**  
731 **colours of the included species and the counts from the four-species community is labelled grey.**  
732 **Red dotted line represents pH in the media without inoculation. The positive effect of pH**  
733 **stabilisation on *Xanthomonas* disappear with decreased media concentration, whereas the effect is**  
734 **still present for *Paenibacillus* at 50% TSB. e) Counts of *Xanthomonas* and *Paenibacillus* across**  
735 **variants of TSB when cultured as part of the four-species community. A strong positive and**  
736 **significant Pearson's correlation between counts of both species ( $\log_2(\text{CFU})$ ) indicates that these**  
737 **two species responds to each other's growth across media concentrations. (n = 4-8 biological**  
738 **replicates, measured at 48 hrs) f) Counts of *Xanthomonas* and *Paenibacillus* when cultured as part**  
739 **of the four-species community across variants of TSB and across time points. Pearson's correlation**  
740 **between counts of both species ( $\log_2(\text{CFU})$ ) (n = 4-8 biological replicates, with n = 4 at 24 hrs and n**  
741 **= 8 at 48 hrs). *Xanthomonas* and *Paenibacillus* has a positive effect on each other in full strength**  
742 **and 50% TSB, while also following each other's growth.**  
743

744

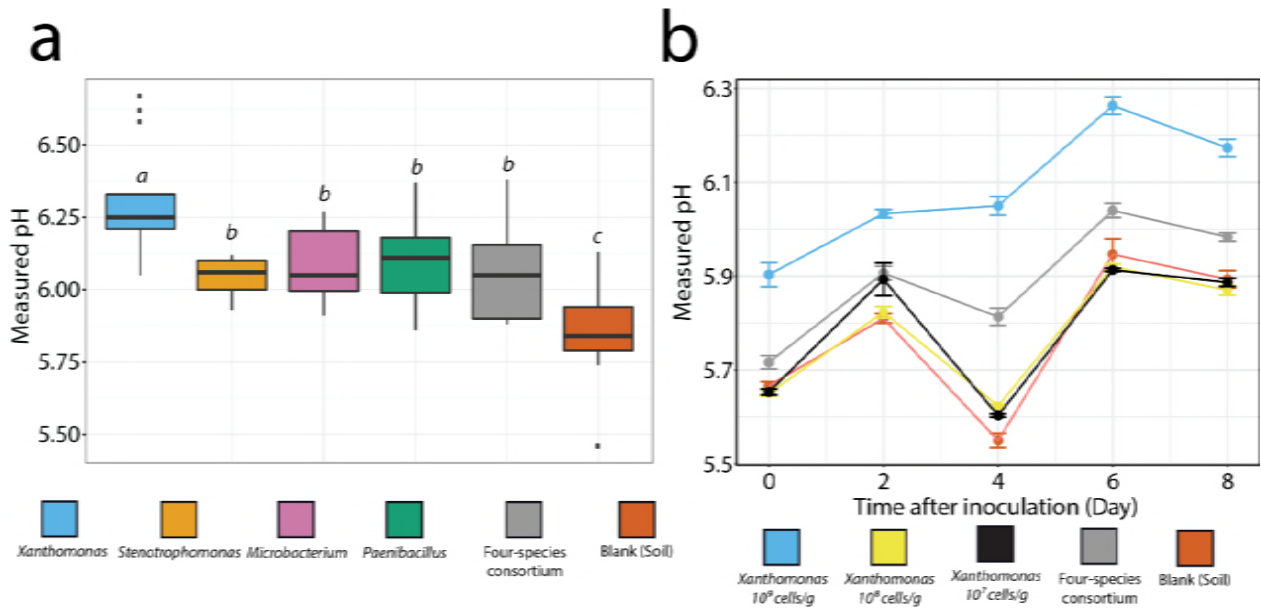

745

746 **Figure 5: Species mediated pH drift in sieved soil. a) Sieved soil was inoculated with 10<sup>9</sup> cells per**  
747 **gram of soil with sampling eight days after inoculation. The single species and four-species**  
748 **consortia significantly increased the pH in the soil samples. Statistical grouping of CFU counts**  
749 **with dissimilar letters indicating significant differences with p<0.05 (GLM). Both single- and four-**  
750 **species inoculum promoted a significant pH drift, as compared to blank soil. (n = 5 biological**  
751 **replicates). b) pH over time in soil inoculated with different cell loadings, no bacteria or with the**  
752 **four-species community. (n = 3 biological replicates). High cell loadings were required for pH drift**  
753 **to occur.**

754
